# Supplementary material for: Thirty-Day Postdischarge Mortality Among Black and White Patients 65 Years and Older in the Medicare Hospital Readmissions Reduction Program
Source: PubMed Central journal article supplement (PMC6484660; doi:10.1001/jamanetworkopen.2019.0634), 2019-03-15
Supplement: jamanetwopen-2-e190634-s001.pdf [file jamanetwopen-2-e190634-s001.pdf]

## Supplementary Online Content

Huckfeldt P, Escarce J, Sood N, Yang Z, Popescu I, Nuckols T. Thirty-day postdischarge mortality among black and white patients 65 years and older in the Medicare Hospital Readmissions Reduction Program. *JAMA Netw Open*. 2019;2(3):e190634. doi:10.1001/jamanetworkopen.2019.0634

**eMethods.** Details on Statistical Approach

**eTable 1.** Characteristics of Black and White Seniors Discharged in 2007-2014 From Hospitals Subject to the Medicare Hospital Readmissions Reduction Program in Fiscal Year 2013, by Time Period

**eTable 2.** Risk-Adjusted 30-Day Post-Discharge All-Cause Mortality Rates Among Black and White Seniors

**eTable 3.** Risk-Adjusted 30-Day Unplanned Readmission Rates Among Black and White Seniors

**eTable 4.** Percentage Point Differences Between Observed and Projected Mortality Rates During the HRRP Penalty Period Using Alternative Model Specifications, Stratified Estimates for Black and White Seniors

This supplementary material has been provided by the authors to give readers additional information about their work.

## eMethods. Details on Statistical Approach

### Specification of regression model

We estimated linear interrupted time series models that indicated deviations from baseline time trends in each quarter of the anticipation and implementation periods and whether deviations differed between black and white seniors.

The main specification is shown in equation (1) below:

$$\begin{aligned} y_{iht} = & \alpha + \rho_1 Quarter_t + \rho_2(Quarter_t \times Race_i) + \beta_0^q Season_t^q + \gamma Race_i + \delta X_{it} + \eta_h \\ & + \sum_{k=1}^{10} \lambda_0^k Anticipate_k + \sum_{k=1}^9 \varphi_0^k Post_k + \beta^q (Season_t^q \times Race_i) \\ & + \sum_{k=1}^{10} \lambda^k (Anticipate_k \times Race_i) + \sum_{k=1}^9 \varphi^k (Post_k \times Race_i) + u_{iht} \quad (1) \end{aligned}$$

where  $y_{iht}$  is an outcome for patient  $i$  seen in hospital  $h$  in calendar quarter  $t$ ;  $Quarter_t$  is a linear time trend in calendar quarters ( $Quarter_t = 1, 2, 3, \dots, 32$ );  $Season_q$  are binary indicator variables for the seasons of the year, to account for seasonality in hospitalization patterns and hospital outcomes;  $Race_i$  is a binary indicator variable that indicates whether patient  $i$  is black;  $X_{it}$  are patient-level control variables (age, gender, and comorbidities);  $\eta_h$  are fixed effects for each hospital  $h$ , to absorb time-invariant hospital attributes;  $Anticipate_1$  through  $Anticipate_{10}$  are binary indicator variables representing each of 10 calendar quarters in the anticipation period (April 1, 2010-September 30, 2012);  $Post_1$  through  $Post_9$  are binary indicator variables representing each of 9 quarters in the implementation period (October 1, 2012-November 30, 2014); and  $Quarter_t \times Race_i$ ,  $Season_q \times Race_i$ ,  $Anticipate_k \times Race_i$ , and  $Post_k \times Race_i$  are interaction terms. The estimates of interest include  $\lambda^1$  through  $\lambda^{10}$  and  $\varphi^1$  through  $\varphi^9$ , the coefficients of the interaction terms, which express the relative change in the outcome  $y$  in each quarter of the anticipation or implementation period for black versus white seniors.

## Testing sensitivity of results to use of linear model specification

We used linear probability models to estimate the association of HRRP with mortality and how this varies by race. One potential concern is that 30-day post-discharge mortality rates are below 10% and thus linear probability models could lead to predicted probabilities below zero and thus differ from probit or logistic model estimates where predicted values are bound between 0 and 1. To account for this, we explored the sensitivity of our estimates to using alternative nonlinear model specifications. It was not feasible to exactly replicate our main estimation using probit or logistic models, because: (1) interaction terms such as those we include between race and time periods in our main models have a complex interpretation in nonlinear models that differs from linear models and the *sign* of interaction effects may vary across different values of covariates<sup>1</sup> and (2) we include hospital fixed effects that are computationally intensive to estimate in a nonlinear context and may lead to nonconvergence of model estimates. Instead, we estimated separate stratified interrupted time series models by race, which avoided the need to estimate and interpret interaction terms. We estimated linear probability models with hospital fixed effects, linear probability models without hospital fixed effects, and probit models without hospital fixed effects in order to determine the sensitivity of our models to both the inclusion of hospital fixed effects and then the sensitivity to using a linear specification. For the probit models, we calculated the difference between observed versus predicted mortality after HRRP implementation using the sample average of marginal effects and, separately, calculating marginal effects at the average of each regressor. The resulting post-HRRP estimates are displayed in eTable 4.

For AMI, we found statistically insignificant estimates of slightly varying magnitudes across the four models for both black and white seniors. For HF, we found marginal effects across the four models for black and white seniors; estimates for black seniors were all statistically insignificant while estimates

---

<sup>1</sup> Ai, C. and E. C. Norton (2003). "Interaction Terms in Logit and Probit Models." *Economics Letters* 80(1): 123-129  
© 2019 Huckfeldt P et al. *JAMA Network Open*.

for white seniors were all statistically significant. For pneumonia, we found slightly varying and all statistically insignificant estimates across the four models for black seniors. For white seniors, we found very similar estimates across the four models that were all statistically significant (or borderline significant in one case). We concluded that our results were not sensitive to the use of a linear rather than nonlinear specification.

eTable 1.

Characteristics of Black and White Seniors Discharged in 2007-2014 From Hospitals Subject to the Medicare Hospital Readmissions Reduction Program in Fiscal Year 2013, by Time Period

| Patient Characteristics                                    | Black Seniors  |               |               | White Seniors    |                |                |
|------------------------------------------------------------|----------------|---------------|---------------|------------------|----------------|----------------|
|                                                            | Pre-HRRP*      | Anticipation  | Penalty       | Pre-HRRP         | Anticipation   | Penalty        |
| Primary Diagnosis, N                                       |                |               |               |                  |                |                |
| AMI                                                        | 40,830         | 30,766        | 26,202        | 500,480          | 354,243        | 297,265        |
| HF                                                         | 155,052        | 110,985       | 89,829        | 1,110,712        | 773,466        | 632,435        |
| Pneumonia                                                  | 76,373         | 53,894        | 43,442        | 979,649          | 669,441        | 527,439        |
| Age, Mean (SD)                                             | 77.8 (8.3)     | 77.9 (8.3)    | 77.7 (8.4)    | 80.4 (8.0)       | 80.6 (8.2)     | 80.5 (8.4)     |
| Male, N (%)                                                | 107,053 (39.3) | 77,161 (39.4) | 63,800 (40.0) | 1,186,337 (45.8) | 832,161 (46.3) | 686,993 (47.2) |
| Medicaid Dual Eligibility, N (%)                           | 126,213 (46.4) | 90,188 (46.1) | 70,477 (44.2) | 447,299 (17.3)   | 312,839 (17.4) | 244,209 (16.8) |
| Comorbidities, Mean (SD)                                   | 2.1 (1.2)      | 2.0 (1.1)     | 2.0 (1.1)     | 2.2 (1.2)        | 2.1 (1.1)      | 2.0 (1.1)      |
| Treated at a Hospital Penalized in Fiscal Year 2013, N (%) |                |               |               |                  |                |                |
| AMI                                                        | 33,915 (83.1)  | 25,493 (82.9) | 21,593 (82.4) | 350,319 (70.0)   | 246,652 (69.6) | 205,074 (69.0) |
| HF                                                         | 130,719 (84.3) | 93,008 (83.8) | 74,556 (83.0) | 820,993 (73.9)   | 567,739 (73.4) | 455,424 (72.0) |
| Pneumonia                                                  | 63,359 (83.0)  | 44,588 (82.7) | 35,515 (81.8) | 703,580 (71.8)   | 480,574 (71.8) | 375,342 (71.2) |
| Unadjusted 30-Day All-Cause Mortality Rate, Mean (SD)      |                |               |               |                  |                |                |
| AMI                                                        | 7.52 (26.4)    | 6.99 (25.5)   | 6.67 (25.0)   | 7.58 (26.5)      | 7.42 (26.2)    | 7.14 (25.8)    |
| HF                                                         | 5.18 (22.2)    | 5.45 (22.7)   | 6.02 (23.8)   | 8.30 (27.6)      | 9.18 (28.9)    | 9.80 (29.7)    |
| Pneumonia                                                  | 7.93 (27.0)    | 8.25 (27.5)   | 8.33 (27.6)   | 8.06 (27.2)      | 8.67 (28.1)    | 8.88 (28.5)    |
| Unadjusted 30-Day Unplanned Readmission Rate, Mean (SD)    |                |               |               |                  |                |                |
| AMI                                                        | 23.10 (42.1)   | 21.88 (41.3)  | 20.12 (40.1)  | 18.03 (38.4)     | 16.98 (37.5)   | 15.25 (36.0)   |
| HF                                                         | 25.90 (43.8)   | 25.21 (43.4)  | 23.14 (42.2)  | 22.71 (41.9)     | 22.04 (41.5)   | 20.60 (40.4)   |
| Pneumonia                                                  | 21.58 (41.1)   | 21.39 (41.0)  | 20.02 (40.0)  | 17.44 (37.9)     | 17.10 (37.6)   | 16.03 (36.7)   |

Abbreviations: HRRP = Medicare Hospital Readmissions Reduction Program, N = number, SD = standard deviation, AMI = acute myocardial infarction, HF = heart failure.

\*The pre-HRRP period was January 2007 to March 2010. The anticipation period was April 2010 to September 2012, after the Affordable Care Act was passed and before the HRRP was implemented. The HRRP penalty period was October 2012 to November 2014, when eligible hospitals were potentially subject to HRRP penalties.

eTable 2:

## Risk-Adjusted 30-Day Post-Discharge All-Cause Mortality Rates Among Black and White Seniors

|                                                                                                                                              | AMI                             | HF                              | Pneumonia                       |
|----------------------------------------------------------------------------------------------------------------------------------------------|---------------------------------|---------------------------------|---------------------------------|
| Hospitals, Total                                                                                                                             | 3,158                           | 3,228                           | 3,250                           |
| Index Hospitalizations, Total                                                                                                                | 1,249,786                       | 2,872,479                       | 2,350,238                       |
| <b>Risk-Adjusted Rates in Pre-HRRP Period, Mean (95% CI)</b>                                                                                 |                                 |                                 |                                 |
| Black Seniors                                                                                                                                | 7.04 (6.75 to 7.33)             | 6.69 (6.56 to 6.82)             | 8.08 (7.88 to 8.27)             |
| White Seniors                                                                                                                                | 7.47 (7.37 to 7.57)             | 8.56 (8.48 to 8.64)             | 8.27 (8.19 to 8.35)             |
| <b>Risk-Adjusted Trends (Slope) in Pre-HRRP Period, Mean (95% CI)</b>                                                                        |                                 |                                 |                                 |
| Black Seniors                                                                                                                                | 0.05 (-0.02 to 0.12)            | -0.01 (-0.04 to 0.02)           | 0.03 (-0.01 to 0.08)            |
| White Seniors                                                                                                                                | -0.01 (-0.03 to 0.01)           | -0.01 (-0.02 to 0.01)           | 0.02 (0.00 to 0.03)             |
| <b>Differences Between Observed and Projected Rates within Each Racial Group and Between Groups (Diff-in-diff) During the Penalty Period</b> |                                 |                                 |                                 |
| <b>Percentage Point Differences When Projected Rates Are Based on Trends in the Pre-HRRP Period, Mean (95% CI), P-value</b>                  |                                 |                                 |                                 |
| Black Seniors (Difference)                                                                                                                   | -1.52 (-3.02 to -0.02), P=0.047 | 0.30 (-0.36 to 0.95), P=0.371   | -0.48 (-1.57 to 0.61), P=0.387  |
| White Seniors (Difference)                                                                                                                   | 0.13 (-0.30 to 0.55), P=0.561   | 0.67 (0.35 to 0.98), P<0.001    | 0.05 (-0.27 to 0.38), P=0.748   |
| Black vs. White Seniors (Diff-in-diff)                                                                                                       | -1.65 (-3.19 to -0.10), P=0.037 | -0.37 (-1.08 to 0.34), P=0.305  | -0.54 (-1.66 to 0.59), P=0.352  |
| <b>Stratified by Hospital Penalty Status</b>                                                                                                 |                                 |                                 |                                 |
| <b>Penalized Hospitals</b>                                                                                                                   |                                 |                                 |                                 |
| Black Seniors (Difference)                                                                                                                   | -2.11 (-3.76 to -0.46), P=0.012 | 0.25 (-0.44 to 0.95), P=0.478   | 0.18 (-1.00 to 1.36), P=0.761   |
| White Seniors (Difference)                                                                                                                   | 0.06 (-0.46 to 0.58), P=0.821   | 0.71 (0.35 to 1.07), P<0.001    | -0.02 (-0.41 to 0.37), P=0.915  |
| Black vs. White Seniors (Diff-in-diff)                                                                                                       | -2.17 (-3.88 to -0.46), P=0.013 | -0.46 (-1.22 to 0.31), P=0.244  | 0.20 (-1.02 to 1.42), P=0.743   |
| <b>Non-Penalized Hospitals</b>                                                                                                               |                                 |                                 |                                 |
| Black Seniors (Difference)                                                                                                                   | 1.28 (-2.21 to 4.78), P=0.472   | 0.55 (-1.27 to 2.37), P=0.555   | -3.67 (-6.51 to -0.83), P=0.011 |
| White Seniors (Difference)                                                                                                                   | 0.29 (-0.47 to 1.05), P=0.457   | 0.55 (-0.08 to 1.18), P=0.089   | 0.24 (-0.35 to 0.83), P=0.420   |
| Black vs. White Seniors (Diff-in-diff)                                                                                                       | 0.99 (-2.57 to 4.56), P=0.585   | 0.00 (-1.87 to 1.88), P=0.998   | -3.91 (-6.84 to -0.98), P=0.009 |
| <b>Percentage Point Differences When Projected Rates Are Based on Mean Rates in the Pre-HRRP Period, Mean (95% CI), P-value</b>              |                                 |                                 |                                 |
| Black Seniors (Difference)                                                                                                                   | -0.48 (-0.88 to -0.07), P=0.020 | 0.11 (-0.09 to 0.31), P=0.279   | 0.23 (-0.12 to 0.58), P=0.204   |
| White Seniors (Difference)                                                                                                                   | -0.04 (-0.16 to 0.09), P=0.554  | 0.50 (0.40 to 0.60), P<0.001    | 0.38 (0.27 to 0.50), P<0.001    |
| Black vs. White Seniors (Diff-in-diff)                                                                                                       | -0.44 (-0.86 to -0.02), P=0.040 | -0.39 (-0.61 to -0.17), P<0.001 | -0.16 (-0.51 to 0.20), P=0.394  |
| <b>Stratified by Hospital Penalty Status</b>                                                                                                 |                                 |                                 |                                 |
| <b>Penalized Hospitals</b>                                                                                                                   |                                 |                                 |                                 |

|                         |                                        |                                 |                                 |                                 |
|-------------------------|----------------------------------------|---------------------------------|---------------------------------|---------------------------------|
|                         | Black Seniors (Difference)             | -0.47 (-0.92 to -0.02), P=0.040 | 0.12 (-0.10 to 0.33), P=0.285   | 0.39 (0.01 to 0.78), P=0.045    |
|                         | White Seniors (Difference)             | -0.06 (-0.21 to 0.10), P=0.468  | 0.46 (0.35 to 0.58), P<0.001    | 0.38 (0.25 to 0.52), P<0.001    |
|                         | Black vs. White Seniors (Diff-in-diff) | -0.41 (-0.89 to 0.06), P=0.086  | -0.35 (-0.58 to -0.11), P=0.004 | 0.01 (-0.38 to 0.41), P=0.952   |
| Non-Penalized Hospitals |                                        |                                 |                                 |                                 |
|                         | Black Seniors (Difference)             | -0.55 (-1.48 to 0.39), P=0.251  | 0.08 (-0.41 to 0.57), P=0.751   | -0.55 (-1.38 to 0.27), P=0.190  |
|                         | White Seniors (Difference)             | 0.01 (-0.21 to 0.22), P=0.940   | 0.59 (0.38 to 0.79), P<0.001    | 0.39 (0.18 to 0.59), P<0.001    |
|                         | Black vs. White Seniors (Diff-in-diff) | -0.56 (-1.51 to 0.40), P=0.254  | -0.51 (-1.03 to 0.02), P=0.059  | -0.94 (-1.78 to -0.10), P=0.029 |

Abbreviations: HRRP = Medicare Hospital Readmissions Reduction Program, 95% CI = 95% confidence interval, AMI = acute myocardial infarction, HF = heart failure.

Notes: "Difference" indicates difference between observed and projected values; "Diff-in-diff" indicates difference between black and white patients in observed vs. projected values (difference in differences).



**eTable 3: Risk-Adjusted 30-Day Unplanned Readmission Rates Among Black and White Seniors**

|                                                                                                                                              | AMI                             | HF                              | Pneumonia                       |
|----------------------------------------------------------------------------------------------------------------------------------------------|---------------------------------|---------------------------------|---------------------------------|
| Hospitals, Total                                                                                                                             | 3,158                           | 3,228                           | 3,250                           |
| Index Hospitalizations, Total                                                                                                                | 1,249,786                       | 2,872,479                       | 2,350,238                       |
| <b>Risk-Adjusted Rates in Pre-HRRP Period, Mean (95% CI)</b>                                                                                 |                                 |                                 |                                 |
| Black Seniors                                                                                                                                | 22.37 (21.88 to 22.86)          | 25.66 (25.32 to 25.99)          | 21.71 (21.34 to 22.08)          |
| White Seniors                                                                                                                                | 17.88 (17.69 to 18.06)          | 22.79 (22.64 to 22.95)          | 17.47 (17.33 to 17.60)          |
| <b>Risk-Adjusted Trends (Slope) in Pre-HRRP Period, Mean (95% CI)</b>                                                                        |                                 |                                 |                                 |
| Black Seniors                                                                                                                                | -0.06 (-0.17 to 0.05)           | 0.04 (-0.03 to 0.10)            | 0.04 (-0.03 to 0.12)            |
| White Seniors                                                                                                                                | -0.03 (-0.06 to 0.00)           | -0.00 (-0.03 to 0.02)           | -0.01 (-0.03 to 0.01)           |
| <b>Differences Between Observed and Projected Rates within Each Racial Group and Between Groups (Diff-in-Diff) During the Penalty Period</b> |                                 |                                 |                                 |
| <b>Percentage Point Differences When Projected Rates Are Based on Trends in the Pre-HRRP Period, Mean (95% CI), P-value</b>                  |                                 |                                 |                                 |
| Black Seniors (Difference)                                                                                                                   | -1.45 (-3.91 to 1.01), P=0.249  | -3.57 (-4.98 to -2.16), P<0.001 | -2.57 (-4.26 to -0.89), P=0.003 |
| White Seniors (Difference)                                                                                                                   | -1.63 (-2.29 to -0.97), P<0.001 | -2.02 (-2.51 to -1.53), P<0.001 | -1.24 (-1.70 to -0.78), P<0.001 |
| Black vs. White Seniors (Diff-in-diff)                                                                                                       | 0.18 (-2.38 to 2.75), P=0.889   | -1.55 (-3.02 to -0.08), P=0.039 | -1.33 (-3.08 to 0.42), P=0.136  |
| <b>Stratified by Hospital Penalty Status</b>                                                                                                 |                                 |                                 |                                 |
| <b>Penalized Hospitals</b>                                                                                                                   |                                 |                                 |                                 |
| Black Seniors (Difference)                                                                                                                   | -2.51 (-5.23 to 0.21), P=0.071  | -4.41 (-5.96 to -2.87), P<0.001 | -3.32 (-5.20 to -1.44), P=0.001 |
| White Seniors (Difference)                                                                                                                   | -3.00 (-3.79 to -2.21), P<0.001 | -3.21 (-3.79 to -2.62), P<0.001 | -2.40 (-2.96 to -1.83), P<0.001 |
| Black vs. White Seniors (Diff-in-diff)                                                                                                       | 0.49 (-2.35 to 3.34), P=0.735   | -1.21 (-2.84 to 0.42), P=0.145  | -0.92 (-2.89 to 1.04), P=0.358  |
| <b>Non-Penalized Hospitals</b>                                                                                                               |                                 |                                 |                                 |
| Black Seniors (Difference)                                                                                                                   | 3.53 (-2.20 to 9.25), P=0.227   | 0.83 (-2.57 to 4.23), P=0.632   | 0.98 (-2.73 to 4.70), P=0.604   |
| White Seniors (Difference)                                                                                                                   | 1.54 (0.41 to 2.66), P=0.007    | 1.28 (0.42 to 2.13), P=0.003    | 1.69 (0.96 to 2.42), P<0.001    |
| Black vs. White Seniors (Diff-in-diff)                                                                                                       | 1.99 (-3.93 to 7.91), P=0.510   | -0.44 (-3.91 to 3.02), P=0.801  | -0.71 (-4.49 to 3.07), P=0.712  |
| <b>Percentage Point Differences When Projected Rates Are Based on Mean Rates in the Pre-HRRP Period, Mean (95% CI), P-value</b>              |                                 |                                 |                                 |
| Black Seniors (Difference)                                                                                                                   | -2.66 (-3.35 to -1.98), P<0.001 | -2.83 (-3.23 to -2.42), P<0.001 | -1.71 (-2.25 to -1.17), P<0.001 |
| White Seniors (Difference)                                                                                                                   | -2.19 (-2.38 to -2.00), P<0.001 | -2.11 (-2.28 to -1.94), P<0.001 | -1.51 (-1.67 to -1.36), P<0.001 |
| Black vs. White Seniors (Diff-in-diff)                                                                                                       | -0.47 (-1.18 to 0.24), P=0.194  | -0.72 (-1.14 to -0.30), P=0.001 | -0.20 (-0.74 to 0.35), P=0.483  |
| <b>Stratified by Hospital Penalty Status</b>                                                                                                 |                                 |                                 |                                 |
| <b>Penalized Hospitals</b>                                                                                                                   |                                 |                                 |                                 |

|                         |                                        |                                 |                                 |                                 |
|-------------------------|----------------------------------------|---------------------------------|---------------------------------|---------------------------------|
|                         | Black Seniors (Difference)             | -2.88 (-3.63 to -2.12), P<0.001 | -3.08 (-3.53 to -2.63), P<0.001 | -2.02 (-2.61 to -1.42), P<0.001 |
|                         | White Seniors (Difference)             | -2.62 (-2.85 to -2.39), P<0.001 | -2.44 (-2.65 to -2.24), P<0.001 | -1.80 (-1.99 to -1.62), P<0.001 |
|                         | Black vs. White Seniors (Diff-in-diff) | -0.26 (-1.05 to 0.54), P=0.527  | -0.64 (-1.11 to -0.17), P=0.008 | -0.21 (-0.83 to 0.40), P=0.497  |
| Non-Penalized Hospitals |                                        |                                 |                                 |                                 |
|                         | Black Seniors (Difference)             | -1.65 (-3.21 to -0.08), P=0.039 | -1.50 (-2.35 to -0.65), P=0.001 | -0.24 (-1.43 to 0.95), P=0.687  |
|                         | White Seniors (Difference)             | -1.23 (-1.54 to -0.92), P<0.001 | -1.22 (-1.48 to -0.95), P<0.001 | -0.79 (-1.04 to -0.53), P<0.001 |
|                         | Black vs. White Seniors (Diff-in-diff) | -0.42 (-2.00 to 1.17), P=0.606  | -0.28 (-1.17 to 0.60), P=0.534  | 0.54 (-0.64 to 1.72), P=0.367   |

Abbreviations: HRRP = Medicare Hospital Readmissions Reduction Program, 95% CI = 95% confidence interval, AMI = acute myocardial infarction, HF = heart failure.

Notes: "Difference" indicates difference between observed and projected values; "Diff-in-diff" indicates difference between black and white patients in observed vs. projected values (difference in differences).

**eTable 4. Percentage Point Differences Between Observed and Projected Mortality Rates During the HRRP Penalty Period Using Alternative Model Specifications, Stratified Estimates for Black and White Seniors**

|                                                                                                                             | Linear Probability Model Estimates   |                                      | Probit Estimates                         |                                                            |
|-----------------------------------------------------------------------------------------------------------------------------|--------------------------------------|--------------------------------------|------------------------------------------|------------------------------------------------------------|
|                                                                                                                             | With Hospital Fixed Effects          | Without Hospital Fixed Effects       | Based on Sample Mean of Marginal Effects | Based on Marginal Effects Calculated at Mean of Covariates |
| <b>Percentage Point Differences When Projected Rates Are Based on Trends in the Pre-HRRP Period, Mean (95% CI), P-value</b> |                                      |                                      |                                          |                                                            |
| <b>AMI</b>                                                                                                                  |                                      |                                      |                                          |                                                            |
| Black seniors                                                                                                               | -1.06<br>(-2.33 to 0.20),<br>P=0.100 | -1.00<br>(-2.26 to 0.26),<br>P=0.120 | -0.94<br>(-2.16 to 0.29),<br>P=0.134     | -0.83<br>(-1.92 to 0.26),<br>P=0.134                       |
| White seniors                                                                                                               | 0.23<br>(-0.14 to 0.60),<br>P=0.215  | 0.25<br>(-0.12 to 0.62),<br>P=0.181  | 0.17<br>(-0.19 to 0.53),<br>P=0.350      | 0.15<br>(-0.16 to 0.45),<br>P=0.350                        |
| <b>HF</b>                                                                                                                   |                                      |                                      |                                          |                                                            |
| Black seniors                                                                                                               | 0.33<br>(-0.25 to 0.91),<br>P=0.265  | 0.39<br>(-0.19 to 0.96),<br>P=0.186  | 0.34<br>(-0.24 to 0.92),<br>P=0.252      | 0.31<br>(-0.22 to 0.85),<br>P=0.252                        |
| White seniors                                                                                                               | 0.72<br>(0.44 to 0.99),<br>P<0.001   | 0.73<br>(0.45 to 1.00),<br>P<0.001   | 0.65<br>(0.37 to 0.92),<br>P<0.001       | 0.62<br>(0.36 to 0.89),<br>P<0.001                         |
| <b>Pneumonia</b>                                                                                                            |                                      |                                      |                                          |                                                            |
| Black seniors                                                                                                               | -0.73<br>(-1.67 to 0.20),<br>P=0.126 | -0.59<br>(-1.53 to 0.34),<br>P=0.213 | -0.57<br>(-1.50 to 0.35),<br>P=0.225     | -0.53<br>(-1.39 to 0.33),<br>P=0.225                       |
| White seniors                                                                                                               | 0.29<br>(0.01 to 0.56),<br>P=0.044   | 0.27<br>(-0.01 to 0.55),<br>P=0.057  | 0.29<br>(0.01 to 0.57),<br>P=0.041       | 0.27<br>(0.01 to 0.54),<br>P=0.041                         |

Abbreviations: HRRP = Medicare Hospital Readmissions Reduction Program, 95% CI = 95% confidence interval, AMI = acute myocardial infarction, HF = heart failure.
